# Supplementary material
Source: publisher site journal article supplement (https://www.kjim.org/upload/media/kjim-2020-223-suppl1.pdf)
Supplement: Supplementary file 1 [file kjim-2020-223-suppl1.pdf]

**Supplementary Table 1. The 25 questions comprising the questionnaire based on the guidelines of the European Respiratory Society and British Thoracic Society**

| Questions                                                                                                                       | Answers                                                                                                                                                                                                                                                        |
|---------------------------------------------------------------------------------------------------------------------------------|----------------------------------------------------------------------------------------------------------------------------------------------------------------------------------------------------------------------------------------------------------------|
| 1. Do you agree to participate in this survey?                                                                                  |                                                                                                                                                                                                                                                                |
| 2. What is the name of your country?                                                                                            |                                                                                                                                                                                                                                                                |
| 3. What is the name of your center?                                                                                             |                                                                                                                                                                                                                                                                |
| 4. How many beds are there in your center?                                                                                      | < 500 beds, 500–999 beds, 1,000–1,499 beds, 1,500–2,000 beds, > 2,000 beds                                                                                                                                                                                     |
| 5. How many outpatients with bronchiectasis do you care for in your clinic per month?                                           | < 50 patients, 50–100 patients, 101–200 patients, 201–300 patients, > 300 patients                                                                                                                                                                             |
| 6. How many years have you worked as a respiratory specialist?                                                                  | 1–2 years, 3–5 years, 6–10 years, 11–20 years, > 20 years, I am not a respiratory specialist                                                                                                                                                                   |
| 7. What is your position?                                                                                                       | Professor (including assistant/associate) in an academic institute, fellowship in an academic institute, respiratory specialist in a private or public hospital (not an academic institute), research position (not in a clinic), officer in government, other |
| 8. Do you have local guidelines regarding bronchiectasis in your country or region?                                             | Yes, no                                                                                                                                                                                                                                                        |
| 9. How often do you check the differential blood count of patients with stable bronchiectasis?                                  | Usually $\geq 4$ times per year, usually 1–3 times per year, usually less than once per year, usually just once (e.g., at initial visit), usually never                                                                                                        |
| 10. Do you perform a serum immunoglobulin test (such as IgG, IgA, and IgM) when diagnosing patients with bronchiectasis?        | Usually yes, usually no, only when suspected in an immunocompromised host, other                                                                                                                                                                               |
| 11. Do you check for ABPA (allergic bronchopulmonary aspergillosis) when diagnosing patients with bronchiectasis?               | Usually yes, usually no, only when combined with asthma, other                                                                                                                                                                                                 |
| 12. How often do you check sputum AFB smear and culture for patients with stable bronchiectasis?                                | Usually $\geq 4$ times per year, usually 1–3 times per year, usually less than once per year, usually just once (e.g. at initial visit), usually never                                                                                                         |
| 13. How often do you check sputum Gram stain and culture for patients with stable bronchiectasis?                               | Usually $\geq 4$ times per year, usually 1–3 times per year, usually less than once per year, usually just once (e.g., at initial visit), usually never                                                                                                        |
| 14. Which method do you prefer to treat bronchiectasis patients with acute exacerbations?                                       | In an outpatient clinic with p.o. antibiotics, in an outpatient clinic with inhaled antibiotics, in a hospital with intravenous antibiotics, in a hospital with inhaled antibiotics                                                                            |
| 15. How long do you/your institution treat bronchiectasis patients with acute exacerbations?                                    | < 7 days, 7–10 days, 10–14 days, 15–21 days, > 21 days                                                                                                                                                                                                         |
| 16. Do you/your institution have available inhaled antibiotics?                                                                 | Yes, no                                                                                                                                                                                                                                                        |
| 16-1. If you answered yes to question 16, what kind of inhaled antibiotics do you have? (multiple choice)                       | Amikacin, tobramycin, gentamicin, aztreonam, ciprofloxacin, colistin, inhaled antibiotics are not available                                                                                                                                                    |
| 17. Do you/your institution perform eradication treatment for patients with drug-sensitive <i>P. aeruginosa</i> infection?      | Usually yes, usually no                                                                                                                                                                                                                                        |
| 17-1. If you answered yes to question 17, where do you treat these patients?                                                    | In an outpatient clinic with p.o. antibiotics, in an outpatient clinic with inhaled antibiotics, in a hospital with intravenous antibiotics, In a hospital with inhaled antibiotics                                                                            |
| 17-2. If you answered yes to question 17, what kind of antibiotics do you prefer to treat drug-sensitive <i>P. aeruginosa</i> ? | Ciprofloxacin, levofloxacin, anti-pseudomonal cephalosporins, anti-pseudomonal penicillins                                                                                                                                                                     |

**Supplementary Table 1. Continued**

| Questions                                                                                                                                                    | Answers                                                                                                                                                                                                                                                                           |
|--------------------------------------------------------------------------------------------------------------------------------------------------------------|-----------------------------------------------------------------------------------------------------------------------------------------------------------------------------------------------------------------------------------------------------------------------------------|
| 17-3. If you answered yes to question 17, how long do you treat these patients?                                                                              | < 7 days, 7–10 days, 11–14 days, 15–20 days, > 21 days                                                                                                                                                                                                                            |
| 17-4. If you answered yes to question 17, do you check sputum culture to confirm eradication after treatment?                                                | Usually yes, usually no                                                                                                                                                                                                                                                           |
| 18. Do you/your institution perform eradication treatment for patients with drug-resistant <i>P. aeruginosa</i> infection?                                   | Usually yes, usually no                                                                                                                                                                                                                                                           |
| 18-1. If you answered yes to question 18, where do you treat these patients?                                                                                 | In an outpatient clinic with p.o. antibiotics, in an outpatient clinic with inhaled antibiotics, in a hospital with intravenous antibiotics, in a hospital with inhaled antibiotics                                                                                               |
| 18-2. If you answered yes to question 18, how long do you treat these patients?                                                                              | < 7 days, 7–10 days, 11–14 days, 15–20 days, > 21 days                                                                                                                                                                                                                            |
| 19. Do you/your institution use an anti-inflammatory agent (usually > 3 months) to treat patients with bronchiectasis?                                       | Usually yes, usually no                                                                                                                                                                                                                                                           |
| 19-1. If you answered yes to question 19, what kind of anti-inflammatory agent do you usually use? (multiple choice)                                         | Inhaled corticosteroid, statin (HMG-CoA reductase inhibitor), macrolide, I do not use an anti-inflammatory agent                                                                                                                                                                  |
| 20. Do you/your institution perform long-term antibiotic treatment ( $\geq$ 3 months) for bronchiectasis patients with three or more exacerbations per year? | Usually yes, usually no                                                                                                                                                                                                                                                           |
| 20-1. If you answered yes to question 20, which regimen do you prefer? (multiple choice)                                                                     | p.o. Macrolide, p.o. macrolide, intravenous antibiotics, inhaled antibiotics                                                                                                                                                                                                      |
| 21. Do you/your institution perform long-term mucoactive treatment ( $\geq$ 3 months) for symptomatic patients?                                              | Usually yes, usually no                                                                                                                                                                                                                                                           |
| 21-1. If you answered yes to question 21, which agent do you usually prefer? (multiple choice)                                                               | Mannitol, nebulized recombinant human DNase, nebulized hypertonic saline, oral mucolytics, I do not prescribe mucoactive treatment for symptomatic patients with bronchiectasis                                                                                                   |
| 22. Do you/your institution perform long-term bronchodilator treatment ( $\geq$ 3 months)? (multiple choice)                                                 | Usually yes, usually no, only when combined with chronic obstructive pulmonary disease, only when combined with asthma                                                                                                                                                            |
| 22-1. If you answered yes to question 22, which agent do you usually prefer? (multiple choice)                                                               | LABA, LAMA, SABA, ICS/LABA, LABA/LAMA combination, I do not perform long-term bronchodilator treatment for patients with bronchiectasis                                                                                                                                           |
| 23. Do you/your institution consider surgical intervention for patients with localized disease and a high frequency of exacerbations?                        | Usually yes, usually no                                                                                                                                                                                                                                                           |
| 24. Do you/your institution consider physiotherapy (airway clearance and/or pulmonary rehabilitation)?                                                       | Usually yes, usually no                                                                                                                                                                                                                                                           |
| 24-1. If you answered yes to question 24, what kind of physiotherapy is available at your institution? (multiple choice)                                     | Postural drainage, oscillating positive expiratory devices, pulmonary rehabilitation                                                                                                                                                                                              |
| 24-2. If your institution is able to perform pulmonary rehabilitation, how often do you prescribe this for patients?                                         | Usually less than once per week, usually 1–3 times per month, usually less than once per month, but more than once per year, usually less than once per year, or just once (e.g. at initial visit), we do not prescribe pulmonary rehabilitation for patients with bronchiectasis |
| 25. What kind of drug do you prefer to treat bronchiectasis patients with blood-tinged sputum or haemoptysis? (multiple choice)                              | Antibiotics, haemostatic agent such as tranexamic acid, anti-tussive                                                                                                                                                                                                              |

Ig, immunoglobulin; AFB, acid-fast bacillus; p.o., per oral; *P. aeruginosa*, *Pseudomonas aeruginosa*; HMG-CoA, 3-hydroxy-3-methylglutaryl coenzyme A; LABA, long acting beta agonist; LAMA, long acting antimuscarinic; SABA, short acting beta agonist; ICS, inhaled corticosteroid.
